# Supplementary material
Source: publisher figshare collection journal article supplement (https://gsapubs.figshare.com/ndownloader/files/22757837)
Supplement: Supplementary file 1 [file 22757837]

**TABLE DR1. CALCULATED ASH CONTENT OF LOS ALAMOS RESERVOIR SEDIMENT SAMPLES**

| Sample number | Sample location*        | Estimated deposit age* | Depth (cm) * | Silt + clay fraction in sample ( $f_i$ ) | $^{137}\text{Cs}$ concentration (C) (pCi/g) | Calculated fraction ash in sample ( $f_a$ )# |
|---------------|-------------------------|------------------------|--------------|------------------------------------------|---------------------------------------------|----------------------------------------------|
| CABG-02-0011  | Center of reservoir     | 8/9/01                 | 3–27         | 0.942                                    | 1.31                                        | 0.043                                        |
| CABG-02-0012  | Center of reservoir     | 8/9/01                 | 27–39        | 0.678                                    | 0.961                                       | 0.031                                        |
| CABG-02-0016  | North side of reservoir | 8/9/01                 | 36–43        | 0.186                                    | 0.240                                       | 0.005                                        |
| CABG-02-0013  | Center of reservoir     | 8/9/01                 | 39–54        | 0.168                                    | 0.204                                       | 0.003                                        |
| CABG-02-0014  | Center of reservoir     | 7/13/01                | 76–97        | 0.969                                    | 1.66                                        | 0.072                                        |
| CABG-02-0015  | Center of reservoir     | 7/2/01                 | 97–109       | 0.439                                    | 0.691                                       | 0.025                                        |
| CABG-02-0018  | North side of reservoir | Spring 2001            | 78–137       | 0.114                                    | 0.137                                       | 0.002                                        |
| CABG-02-0017  | North side of reservoir | Spring 2001            | 87–102       | 0.108                                    | 0.223                                       | 0.009                                        |
| CABG-02-0009  | Center of reservoir     | Spring 2001            | 109–132      | 0.913                                    | 2.33                                        | 0.134                                        |
| CABG-02-0010  | Center of reservoir     | Spring 2001            | 132–142      | 0.746                                    | 1.62                                        | 0.084                                        |
| CABG-02-0008  | Center of reservoir     | 9/8/00                 | 173–193      | 0.909                                    | 2.39                                        | 0.139                                        |
| CABG-02-0007  | Center of reservoir     | 7/18/00                | 231–289      | 0.922                                    | 3.76                                        | 0.256                                        |
| CABG-02-0006  | Center of reservoir     | 7/18/00                | 289–329      | 0.703                                    | 2.50                                        | 0.161                                        |
| CABG-02-0004  | Center of reservoir     | 7/18/00                | 329–354      | 0.306                                    | 1.35                                        | 0.090                                        |
| CABG-02-0005  | Center of reservoir     | 7/18/00                | 354–370      | 0.132                                    | 0.679                                       | 0.045                                        |
| CABG-02-0003  | Center of reservoir     | 7/16/00                | 370–388      | 0.900                                    | 5.06                                        | 0.366                                        |
| CABG-02-0002  | Center of reservoir     | 6/28/00                | 406–432      | 0.883                                    | 4.66                                        | 0.333                                        |
| CABG-02-0001  | Center of reservoir     | 1943–2000              | 451–470      | 0.917                                    | 0.962                                       | N.A.**                                       |

\*Stratigraphic section in center of reservoir and estimated ages of sediment layers shown in Figure 4 of Lavine et al. (2006).

#Calculated fraction ash in sample based on Equation 4 and using  $^{137}\text{Cs}$  concentration in ash ( $C_a$ ) = 13.0 pCi/g,  $a = 0.02$ , and  $b = 0.85$ .

\*\*N.A. = not applicable.

**TABLE DR2. SEDIMENT DEPOSITION IN LOS ALAMOS RESERVOIR**

| Period of sediment deposition | Total volume (m <sup>3</sup> )* | Volume coarse-grained sediment (m <sup>3</sup> )* | Volume fine-grained sediment (m <sup>3</sup> )* | Mass coarse-grained sediment (Mg)# | Mass all fine-grained sediment (Mg)# | Mass ash (Mg)** | Mass fine-grained sediment excluding ash (Mg) | Total mass sediment (Mg) |
|-------------------------------|---------------------------------|---------------------------------------------------|-------------------------------------------------|------------------------------------|--------------------------------------|-----------------|-----------------------------------------------|--------------------------|
| 1943–5/10/00                  | 8600                            | N.D.##                                            | N.D.                                            | N.D.                               | N.D.                                 | N.D.            | N.D.                                          | 10729***                 |
| 5/10/00–6/28/01               | 21800                           | 5300                                              | 16500                                           | 8639                               | 18480                                | 3567            | 14913                                         | 27119                    |
| 6/28/01–4/2/02                | 8000                            | 0                                                 | 8000                                            | 0                                  | 8960                                 | 323             | 8637                                          | 8960                     |
| 4/2/02–7/23/03                | 4000                            | 900                                               | 3100                                            | 1467                               | 3472                                 | 0               | 3472                                          | 4939                     |
| 7/23/03–6/30/04               | 4800                            | 3700                                              | 1100                                            | 6031                               | 1232                                 | 0               | 1232                                          | 7263                     |
| 6/30/04–7/11/05               | 4500                            | 3500                                              | 1000                                            | 5705                               | 1120                                 | 0               | 1120                                          | 6825                     |

\*Sediment volumes from Lavine et al. (2006), Table 2; coarse-grained sediment assumed equal to volume of delta, and fine-grained sediment assumed equal to remainder of volume.

#Conversion from volume to mass uses average density of coarse-grained sediment of 1.63 g/cm<sup>3</sup> and fine-grained sediment of 1.12 g/cm<sup>3</sup> based on measurements of 23 samples from Los Alamos Reservoir.

\*\*Ash estimated to constitute 19.3% of fine-grained sediment in 2000 and 3.6% in 2001 based on calculations in Table DR1 and thickness of layers in measured stratigraphic section shown in Figure 4 of Lavine et al. (2006). Suspended sediment samples from the burn area (Gallaher and Koch, 2004) indicate that sediment after 2001 had negligible ash content.

## N.D. = not determined

\*\*\*Estimated mass of sediment from 1943 to May 10, 2000 based on assumption of 75% fine-grained sediment and 25% coarse-grained sediment and same densities as for postfire samples.
